# Supplementary material for: Characterizing Powdered Activated Carbon Treatment of Surface Water Samples Using Polarity-Extended Non-Target Screening Analysis
Source: MDPI journal article supplement (doi:10.3390/molecules27165214), 2022-08-16
Supplement: s1 [file s1]

# Supplementary material of “Characterizing powdered activated carbon treatment of surface water samples using polarity-extended non-target screening analysis”

Susanne Minkus <sup>1,2</sup>, Stefan Bieber <sup>2</sup> and Thomas Letzel <sup>1,2,\*</sup>

<sup>1</sup> Technical University of Munich (Chair of Urban Water Systems Engineering), Garching, Germany

<sup>2</sup> Analytisches Forschungsinstitut für Non-Target Screening (AFIN-TS) GmbH

\* Correspondence: t.letzel@afin-ts.de

Table S1: Means and standard deviations of  $\log_2(fc)$  values for the internal standards and the polar standard compounds measured in negative ionization mode. H118, H120 and H121 are the laboratory names of the different PAC types (Table 1) which were tested for surface water treatment at three different concentrations.

|                           | <b>H118</b>  | <b>H120</b>  | <b>H121</b>  |
|---------------------------|--------------|--------------|--------------|
| <b>Internal standards</b> | n = 10       | n = 10       | n = 10       |
| 2 mg L <sup>-1</sup>      | 0.07 ± 0.05  | -0.24 ± 0.05 | 0.06 ± 0.07  |
| 7 mg L <sup>-1</sup>      | 0.14 ± 0.09  | -0.32 ± 0.08 | 0.18 ± 0.07  |
| 30 mg L <sup>-1</sup>     | 0.04 ± 0.08  | -0.37 ± 0.07 | 0.23 ± 0.07  |
| <b>Polar standards</b>    | n = 2        | n = 3        | n = 5        |
| 2 mg L <sup>-1</sup>      | -0.13 ± 0.12 | -0.12 ± 0.24 | -0.35 ± 1.16 |
| 7 mg L <sup>-1</sup>      | 0.20 ± 0.73  | -0.25 ± 0.37 | -2.16 ± 3.04 |
| 30 mg L <sup>-1</sup>     | 0.18 ± 0.86  | -0.75 ± 1.19 | -1.59 ± 2.94 |

Table S2: Means and standard deviations of  $\log_2(fc)$  values for the non-target features in negative ionization mode. H118, H120 and H121 are the laboratory names of the different PAC types (Table 1) which were tested for surface water treatment at three different concentrations.

|                       | <b>Number of features</b> | <b>Mean <math>\log_2(fc)</math></b> | <b>Increasing/decreasing features [%]</b> | <b>Significant feature</b> |
|-----------------------|---------------------------|-------------------------------------|-------------------------------------------|----------------------------|
| <b>H118</b>           |                           |                                     |                                           |                            |
| 2 mg L <sup>-1</sup>  | 2318                      | -0.02 ± 0.31                        | 0.3/0.5                                   | 0                          |
| 7 mg L <sup>-1</sup>  | 2433                      | -0.13 ± 0.51                        | 1.6/4.5                                   | 121                        |
| 30 mg L <sup>-1</sup> | 2482                      | -0.05 ± 0.55                        | 2.6/3.7                                   | 118                        |
| <b>H120</b>           |                           |                                     |                                           |                            |
| 2 mg L <sup>-1</sup>  | 2378                      | 0.19 ± 0.34                         | 2.9/0.0                                   | 17                         |
| 7 mg L <sup>-1</sup>  | 2332                      | 0.21 ± 0.36                         | 3.5/0.2                                   | 50                         |
| 30 mg L <sup>-1</sup> | 2333                      | 0.30 ± 0.38                         | 6.7/0.2                                   | 125                        |
| <b>H121</b>           |                           |                                     |                                           |                            |
| 2 mg L <sup>-1</sup>  | 2277                      | -0.03 ± 0.35                        | 0.2/0.7                                   | 0                          |
| 7 mg L <sup>-1</sup>  | 2357                      | -0.10 ± 0.37                        | 0.2/1.6                                   | 0                          |
| 30 mg L <sup>-1</sup> | 2402                      | -0.06 ± 0.38                        | 0.1/1.3                                   | 4                          |

Table S3: Table of internal standards spiked into samples after treatment and prior to LC-MS analysis

| Name                                              | InChIKey                     | Chemical formula | Log D (pH 7) | Solvent stock   | C(Stock) [μM] | Manufacturer     |
|---------------------------------------------------|------------------------------|------------------|--------------|-----------------|---------------|------------------|
| <b>6-amino-1,3-dimethyl-5-(formylamino)uracil</b> | ZNDGAXCBZGSJGU-UHFFFAOYSA-N  | C7H10N4O3        | -2.00        | ACN/H2O (50/50) | 1000          | Sigma            |
| <b>Etilefrine</b>                                 | SQVIAVUSQAWMKL-UHFFFAOYSA-N  | C10H15NO2        | -1.42        | ACN             | 1000          | Sigma            |
| <b>Sotalol</b>                                    | ZBMZVLHSJCTVON-UHFFFAOYSA-N  | C12H20N2O3S      | -2.47        | ACN             | 586           | Sigma            |
| <b>Vidarabine</b>                                 | OIRDTQYFTABQOQ-UHTZMRCNSA-N  | C10H15N5O5       | -2.1         | ACN/H2O (50/50) | 337           |                  |
| <b>Chloridazon</b>                                | WYKYKTKDBLFHCY-UHFFFAOYSA-N  | C10H8ClN3O       | 1.11         | ACN/H2O (50/50) | 1000          | Sigma            |
| <b>Chlorbromuron</b>                              | NLYNUTMZTCLN OO-UHFFFAOYSA-N | C9H10BrClN2O2    | 2.85         | Methanol        | 1000          | Dr. Ehrenstorfer |
| <b>Chlortoluron</b>                               | JXCGFZX SOMJFOA-UHFFFAOYSA-N | C10H13ClN2O      | 2.44         | ACN             | 1000          | Sigma            |
| <b>Metconazole</b>                                | XWPZUHJBOLQNMN-UHFFFAOYSA-N  | C17H22ClN3O      | 3.59         | Methanol        | 1000          | Sigma            |
| <b>Metobromuron</b>                               | WLFDQEVORAMCIM-UHFFFAOYSA-N  | C9H11BrN2O2      | 2.24         | ACN             | 1096          | Sigma            |
| <b>Monuron</b>                                    | BMLIZLVNXIYGCK-UHFFFAOYSA-N  | C9H11ClN2O       | 1.93         | Methanol        | 970           | Sigma            |

Table S4: Polar standard compounds spiked into samples prior to PAC treatment.

| Name                                          | InChIKey                     | Chemical formula | Log D (pH 7) |
|-----------------------------------------------|------------------------------|------------------|--------------|
| <b>1,3-Dimethyl-2-imidazolidinone</b>         | CYSGHNMQYZDMIA-UHFFFAOYSA-N  | C5H10N2O         | -0.64        |
| <b>2,2,6,6-tetramethyl-4-piperidone</b>       | JWUXJYZVKZKLTJ-UHFFFAOYSA-N  | C9H17NO          | -0.32        |
| <b>2,4-diamino-6-(hydroxymethyl)pteridine</b> | CYNARAWTVHQHDI-UHFFFAOYSA-N  | C7H8N6O          | -1.37        |
| <b>2-aminopyridine</b>                        | ICSNLGPSPRYBMBD-UHFFFAOYSA-N | C5H6N2           | 0.30         |

|                                                                  |                              |             |       |
|------------------------------------------------------------------|------------------------------|-------------|-------|
| <b>3-pyridinemethanol</b>                                        | MVQVNTPHUGQQHK-UHFFFAOYSA-N  | C6H7NO      | -0.01 |
| <b>Ectoine</b>                                                   | WQXNXVUDBPYKBA-UHFFFAOYSA-N  | C6H10N2O2   | -2.53 |
| <b>Famotidine</b>                                                | XUFQPHANEAPMJ-UHFFFAOYSA-N   | C8H15N7O2S3 | -3.04 |
| <b>4-(2-hydroxyethyl)morpholine</b>                              | KKFDCBRMNNNSAAW-UHFFFAOYSA-N | C6H13NO2    | -1.12 |
| <b>Miglitol</b>                                                  | IBAQFPQHRJAVAV-ULAWRXDQSA-N  | C8H17NO5    | -3.89 |
| <b>N,N'-ethylenebisacetamide; (N,N'-ethylenedi(diacetamide))</b> | WNYIBZHOMJZDKN-UHFFFAOYSA-N  | C6H12N2O2   | -1.78 |
| <b>Acamprosate</b>                                               | AFCGFAGUEYAMAO-UHFFFAOYSA-N  | C5H11NO4S   | -4.10 |
| <b>L-Leucine</b>                                                 | ROHFNLRQFUQHCH-UHFFFAOYSA-N  | C6H13NO2    | -1.59 |

Table S5: Parameter settings of each processing step of the non-target screening workflow for comparative analysis of an untreated and a treated sample. Parameters that were sufficiently optimized in a previous study [1] are highlighted in green. Parameters that were adapted to the circumstances of the present investigation are marked in red. In case there was no need to optimize default settings they are depicted in blue. If parameter settings differed for negative ionization mode, the values are given in brackets.

| Processing step       | Description | Parameter                             | Setting           | Comment                                                                           |
|-----------------------|-------------|---------------------------------------|-------------------|-----------------------------------------------------------------------------------|
| Mass detection        |             | Algorithm                             | Wavelet transform | Detects peaks using continuous wavelet transformation using “Mexican Hat” wavelet |
|                       |             | Noise level                           | 10,000            | Minimum intensity of a data point to be considered in chromatogram                |
|                       |             | Scale level                           | 6                 | Stretches or compresses the wavelet                                               |
|                       |             | Wavelet window size                   | 30 %              | Window size used to calculate wavelet                                             |
|                       |             | RT range                              | 5 min – 33 min    | Corresponds to the HILIC and RPLC elution intervals                               |
|                       |             | MS levels                             | 1+2               |                                                                                   |
|                       |             | Polarity                              | +(-)              |                                                                                   |
|                       |             | Spectrum type                         | Profile           | Adapted to the raw data format of the vendor (Thermo Fisher Scientific)           |
| Chromatogram building |             | Minimum group size in number of scans | 5                 |                                                                                   |

|                              |                                                                               |                             |                  |                                                                                                                                                           |
|------------------------------|-------------------------------------------------------------------------------|-----------------------------|------------------|-----------------------------------------------------------------------------------------------------------------------------------------------------------|
|                              | Constructs EICs using the ADAP algorithms[2]                                  | Group intensity threshold   | 20,000           | Optimized to minimize total number of features and processing time and maximize recall of standard compounds (n=20)                                       |
|                              |                                                                               | Minimum highest intensity   | 50,000           | Optimized to minimize total number of features and processing time and maximize recall of standard compounds (n=20)                                       |
|                              |                                                                               | m/z tolerance               | 0.0012 Da        | Derived from targeted analysis: Maximum m/z span over all sample injections (n=35) and standard compounds (n=20), rounded up to 4 <sup>th</sup> decimal   |
| Smoothing                    | Applies Savitzky-Golay filter to                                              | Filter width                | 25               | Adapted to noisier data                                                                                                                                   |
| Chromatogram deconvolution   | Separates each chromatogram into individual peaks                             | Algorithm                   | Wavelets (ADAP)  |                                                                                                                                                           |
|                              |                                                                               | S/N threshold               | 10               |                                                                                                                                                           |
|                              |                                                                               | Minimum feature height      | 100,000 (50,000) | Optimized to minimize total number of features and processing time and maximize recall of standard compounds (n=20)                                       |
|                              |                                                                               | Coefficient/are a threshold | 30               |                                                                                                                                                           |
|                              |                                                                               | Peak duration range (low)   | 0.13 min         |                                                                                                                                                           |
|                              |                                                                               | Peak duration range (high)  | 8.00 min         | Adapted to achieve full recall of standard compounds (n=20)                                                                                               |
|                              |                                                                               | RT wavelet range (low)      | 0.03 min         |                                                                                                                                                           |
|                              |                                                                               | RT wavelet range (high)     | 2.00 min         | Adapted to achieve full recall of standard compounds (n=20)                                                                                               |
|                              |                                                                               | m/z center calculation      | Median           |                                                                                                                                                           |
| Peak filter                  | Eliminates peaks which do not meet the specified criteria                     | Number of data points       | 2 – 1600         | Derived from targeted analysis: Minimum and maximum of all sample injections (n=35(36)) and standard compounds (n=20), rounded up and down, respectively. |
|                              |                                                                               | Tailing factor              | 0.40 – 8.30      |                                                                                                                                                           |
|                              |                                                                               | Asymmetry factor            | 0.05 – 13.59     |                                                                                                                                                           |
| Isotope grouping and removal | Recognizes isotopic patterns within defined RT and m/z ranges and removes all | m/z tolerance               | 0.0012 Da        | Derived from targeted analysis: Maximum m/z span over all sample injections (n=35) and standard compounds (n=20), rounded up to 4 <sup>th</sup> decimal   |

|                            |                                                                                                                                  |                                     |                                    |                                                                                                                                                |
|----------------------------|----------------------------------------------------------------------------------------------------------------------------------|-------------------------------------|------------------------------------|------------------------------------------------------------------------------------------------------------------------------------------------|
|                            | peaks except the highest isotope                                                                                                 | RT tolerance                        | 0.62 min                           | Derived from targeted analysis: Maximum RT span over replicate injections and standard compounds (n=20), rounded up to 2 <sup>nd</sup> decimal |
|                            |                                                                                                                                  | Maximum charge                      | 1                                  |                                                                                                                                                |
|                            |                                                                                                                                  | Representative isotope              | Lowest m/z                         |                                                                                                                                                |
| Adduct tagging and removal | Recognizes adduct peaks within defined RT and mass range                                                                         | RT tolerance                        | 0.62 min                           | Derived from targeted analysis: Maximum RT span over replicate injections and standard compounds (n=20), rounded up to 2 <sup>nd</sup> decimal |
|                            |                                                                                                                                  | Adduct m/z differences              | 21.9825 Da, 37.9559 Da, 17.0265 Da |                                                                                                                                                |
|                            |                                                                                                                                  | m/z tolerance                       | 0.0012 Da                          | Derived from targeted analysis: Maximum m/z span over all sample injections (n=35) and standard compounds (n=20), rounded up to 4th decimal    |
|                            |                                                                                                                                  | Maximum relative adduct peak height | 100 %                              |                                                                                                                                                |
| Intra-sample alignment     | Aligns peaks across technical replicates and corrects RT deviations based on RANSAC algorithm and non-linear regression model[3] | m/z tolerance                       | 0.0015 Da                          | Adapted to achieve full recall of standard compounds (n=20)                                                                                    |
|                            |                                                                                                                                  | RT tolerance                        | 1.00 min                           | Sets RT range to create the model for RT correction                                                                                            |
|                            |                                                                                                                                  | RT tolerance after correction       | 0.62 min                           | Derived from targeted analysis: Maximum RT span over replicate injections and standard compounds (n=20), rounded up to 2 <sup>nd</sup> decimal |
|                            |                                                                                                                                  | RANSAC iterations                   | 2000                               | Maximum number of iterations to find model                                                                                                     |
|                            |                                                                                                                                  | Minimum number of points            | 20 %                               | Minimum portion of points required for a valid model                                                                                           |
|                            |                                                                                                                                  | Threshold value                     | 0.07 min                           | Threshold for a data point to fit the model                                                                                                    |
| Duplicate filter           | Finds features of which the m/z and RT difference is lower than the predefined tolerances                                        | Filter mode                         | New average                        | Creates consensus feature from duplicates                                                                                                      |
|                            |                                                                                                                                  | m/z tolerance                       | 0.0015 Da                          | Adapted to achieve full recall of standard compounds (n=20)                                                                                    |
|                            |                                                                                                                                  | RT tolerance                        | 0.62 min                           | Derived from targeted analysis: Maximum RT span over replicate injections and standard compounds (n=20), rounded up to 2 <sup>nd</sup> decimal |
| Replicate filter           |                                                                                                                                  | Minimum peaks                       | 3                                  |                                                                                                                                                |
| Inter-sample alignment     | Aligns peaks across treated                                                                                                      | m/z tolerance                       | 0.0015 Da                          | Adapted to achieve full recall of standard compounds (n=20)                                                                                    |

|                         |                                                                                                |                               |                                        |                                                                                                                                                |
|-------------------------|------------------------------------------------------------------------------------------------|-------------------------------|----------------------------------------|------------------------------------------------------------------------------------------------------------------------------------------------|
|                         | and untreated sample and corrects RT deviations based on RANSAC algorithm and non-linear       | RT tolerance                  | 1.00 min                               | Sets RT range to create the model for RT correction                                                                                            |
|                         |                                                                                                | RT tolerance after correction | 0.62 min                               | Derived from targeted analysis: Maximum RT span over replicate injections and standard compounds (n=20), rounded up to 2 <sup>nd</sup> decimal |
|                         |                                                                                                | RANSAC iterations             | 2000                                   | Maximum number to find model                                                                                                                   |
|                         |                                                                                                | Minimum number of points      | 20 %                                   | Minimum portion of points required for a valid model                                                                                           |
|                         |                                                                                                | Threshold value               | 0.07 min                               | Threshold for a data point to fit the model                                                                                                    |
| Gap filling             | Searches for missing peaks using the m/z and RT range defined by the rest of the aligned peaks | m/z tolerance                 | 0.0015 Da                              | Adapted to achieve full recall of standard compounds (n=20) and added to the m/z range constituted by the other peaks of the feature           |
| Replicate filter        |                                                                                                | Minimum peaks                 | 6                                      |                                                                                                                                                |
| Intensity normalization | The peak heights of a feature are normalized using internal standards                          | Normalization type            | Weighted contribution of all standards |                                                                                                                                                |
|                         |                                                                                                | Peak measurement type         | Peak height                            |                                                                                                                                                |
|                         |                                                                                                | Standard compounds            | Internal standards                     | N = 10, compare Table S1                                                                                                                       |

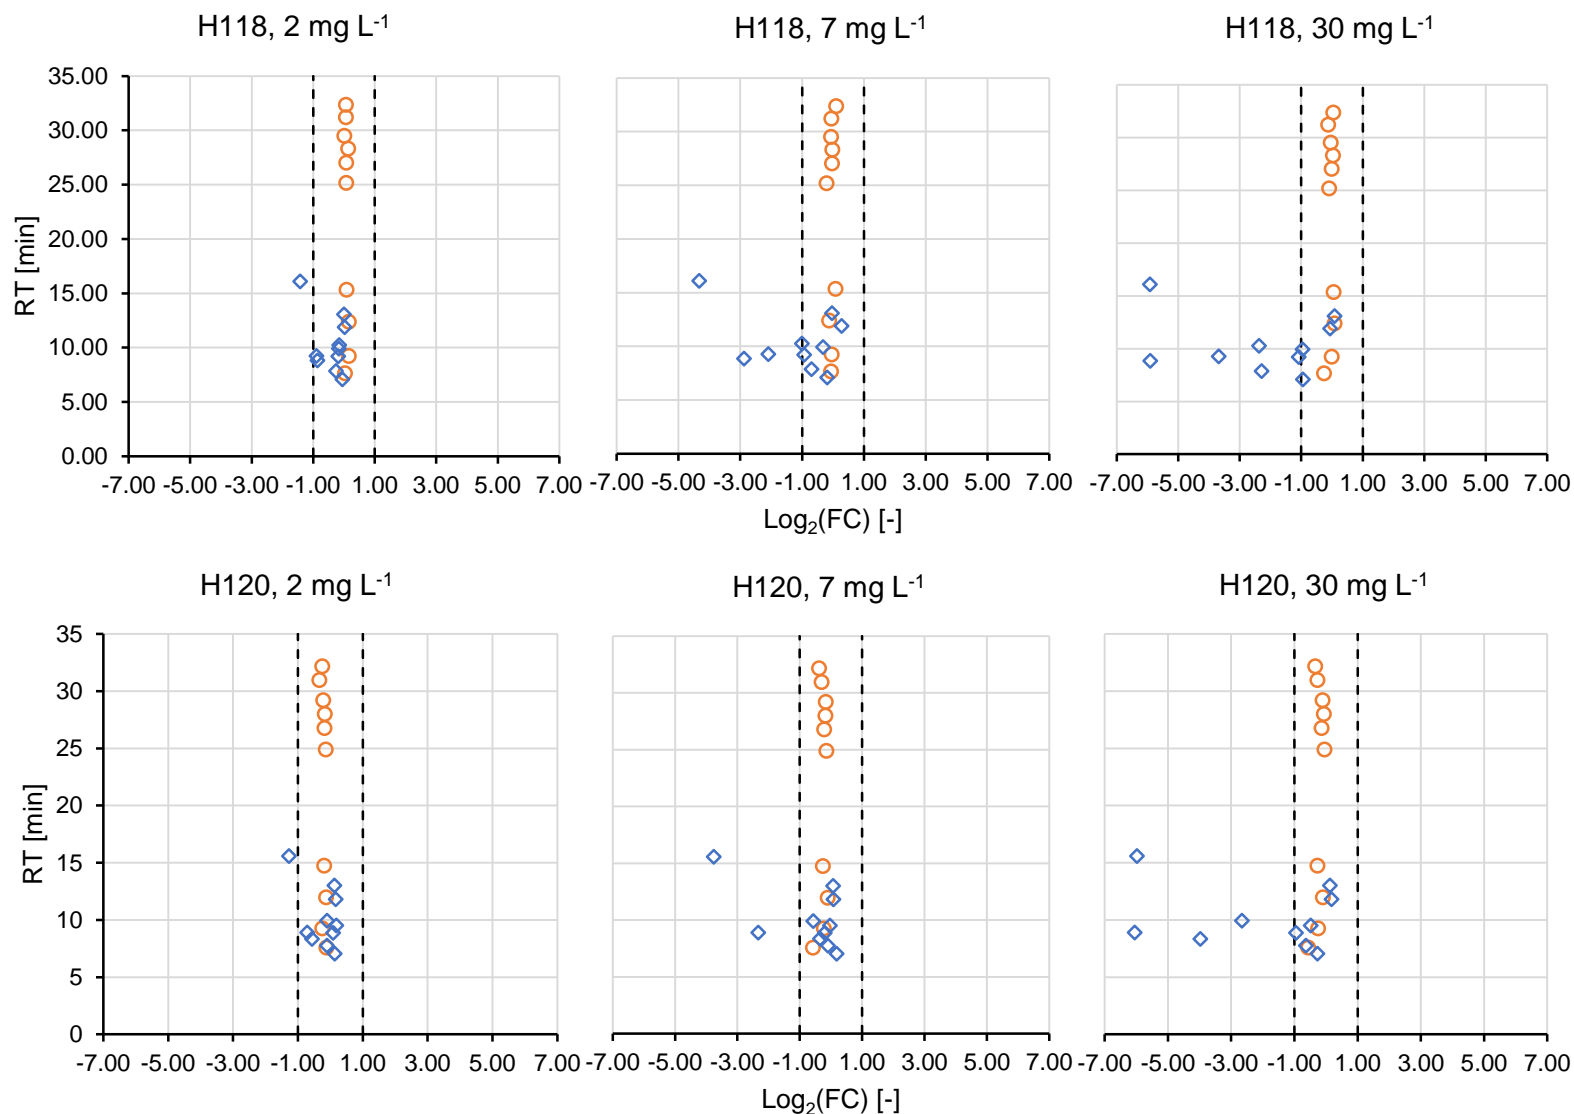

Figure S1: The base-2 logarithm of the fold changes of the polar standard compounds (blue diamonds) and the internal standards (orange circles) are plotted versus their retention times. The dashed lines mark the consistency interval where no compound removal is assumed. The data was recorded in positive ionization mode. The plots indicate that PAC H118 adsorbed the compounds famotidine, 2,4-diamino-6-(hydroxymethyl)pteridine, 3-pyridinemethanol, 2-aminopyridine and 4-(2-hydroxyethyl)morpholine. No decrease was observed for 4-(2-hydroxyethyl)morpholine when treating the sample with PAC H120.

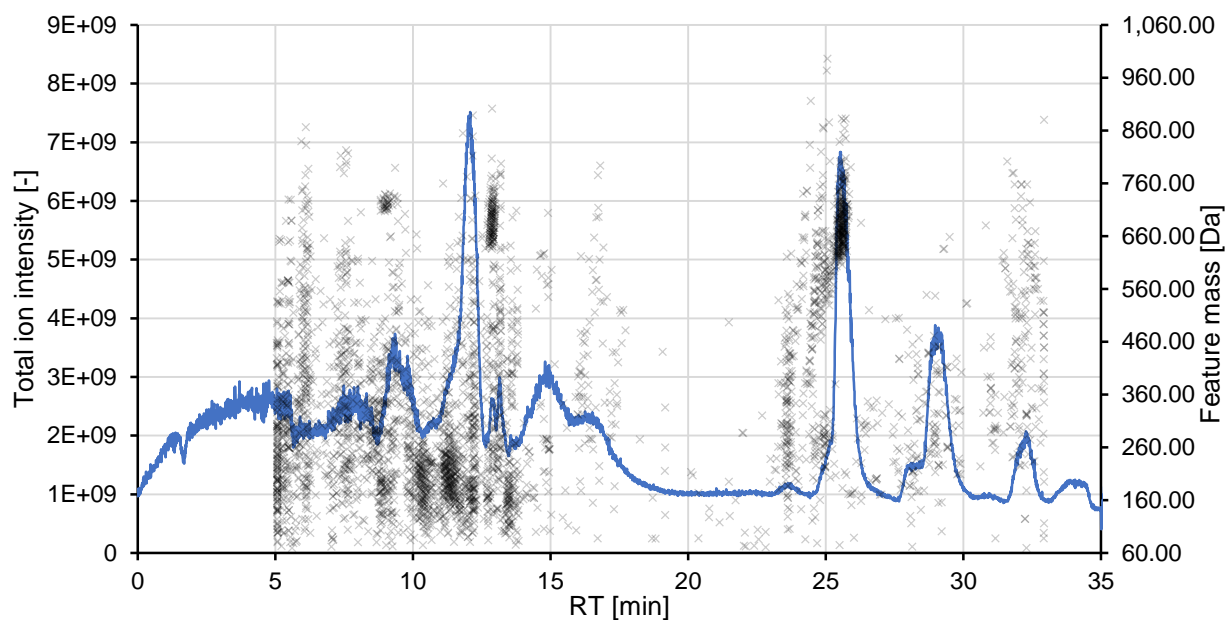

Figure S2: The total ion chromatograms (blue line, primary y-axis) and the non-target peaks (black crosses, secondary y-axis) are exemplarily displayed for the sample treated with the H118 PAC at 30mg L<sup>-1</sup>, third replicate.

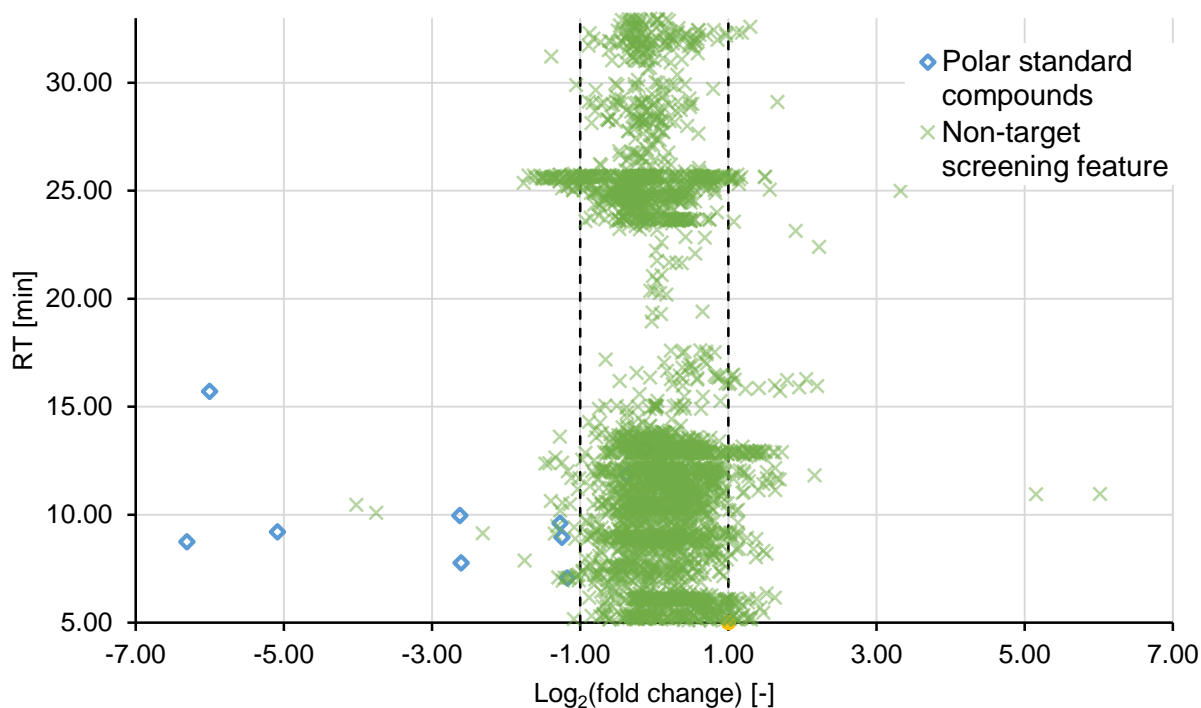

Figure S3: Non-target features (green crosses) and polar standard compounds (blue diamonds). The dashed lines mark the consistency interval. Log<sub>2</sub>(fc) values < -1 and > 1 are defined as a decrease and increase in signal intensity, respectively. Here, the sample treated with 30 mg L<sup>-1</sup> of PAC H118 was compared to the untreated blank sample, both measured in positive ionization mode.



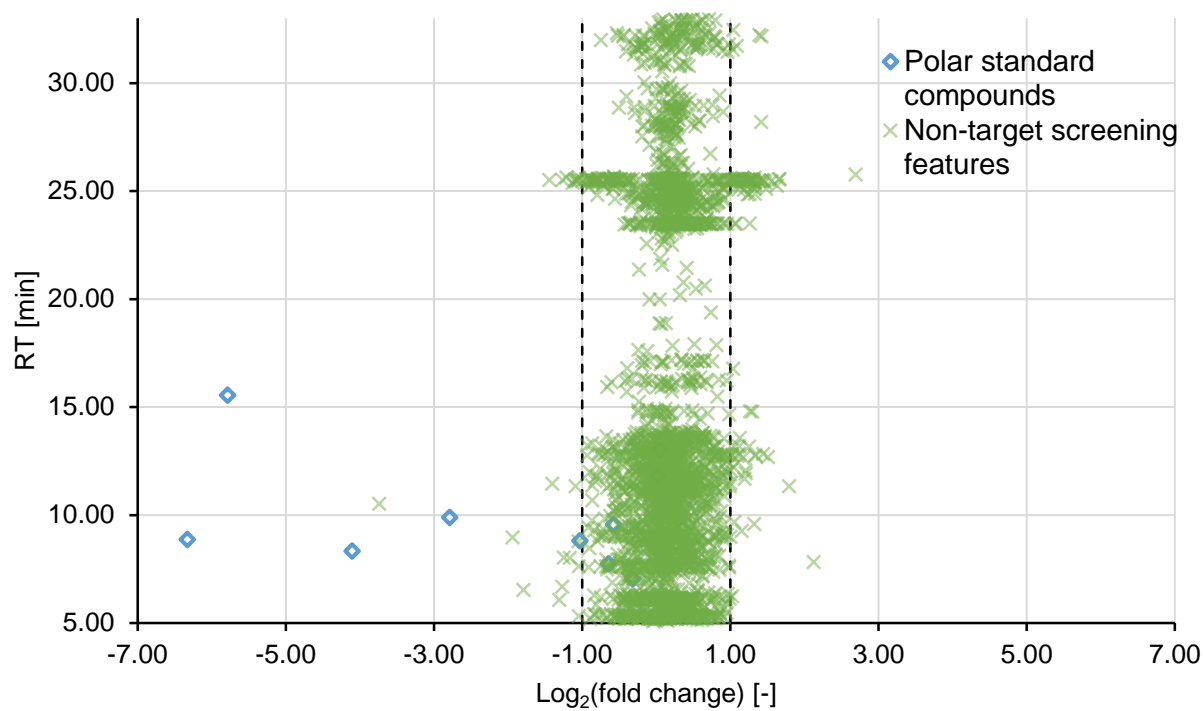

Figure S4: Non-target features (green crosses) and polar standard compounds (blue diamonds) of the sample treated with 30 mg L<sup>-1</sup> of PAC H120 compared to the untreated blank sample, both measured in positive ionization mode.

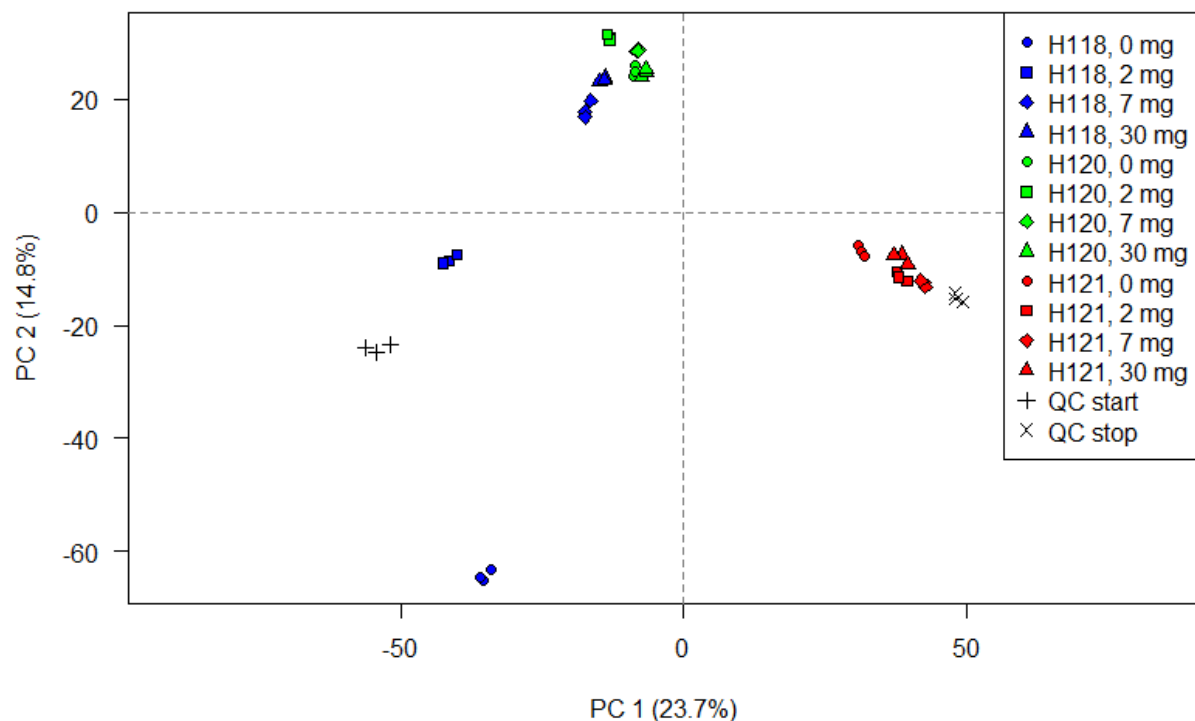

Figure S5: Scores plot of the PCA based on the normalized peak heights of the features extracted from each individual measurement in negative ionization mode.

## References:

1. Minkus S, Bieber S, Letzel T (2021) (Very) polar organic compounds in the Danube river basin: Non-target screening workflow and prioritization strategy for extracting highly confident features. *Anal Methods* 13:2044–2054.<https://doi.org/10.1039/D1AY00434D>
2. Myers OD, Sumner SJ, Li S, Barnes S, Du X (2017) One Step Forward for Reducing False Positive and False Negative Compound Identifications from Mass Spectrometry Metabolomics Data: New Algorithms for Constructing Extracted Ion Chromatograms and Detecting Chromatographic Peaks. *Anal Chem* 89:8696–8703.<https://doi.org/10.1021/acs.analchem.7b00947>
3. Pluskal T, Castillo S, Villar-Briones A, Orešič M (2010) MZmine 2: Modular framework for processing, visualizing, and analyzing mass spectrometry-based molecular profile data. *BMC Bioinformatics* 11:<https://doi.org/10.1186/1471-2105-11-395>
